# Supplementary material for: Adult stem cells and niche cells segregate gradually from common precursors that build the adult Drosophila ovary during pupal development
Source: eLife. 2021 Sep 30;10:e69749. doi: 10.7554/eLife.69749 (PMC8536258; doi:10.7554/eLife.69749)
Supplement: Figure 2—source data 1. [file elife-69749-fig2-data1.xlsx]

## Sheet: Sheet1
	Figure 2C
	% clone types over time
	Day	EC-only	EC/FSC	FSC-only	n clones
	-6	44.1	53.2	2.7	111
	-5	57.5	39.7	2.7	73
	-4	56.8	37.5	4.6	88
	-3	30.2	39.7	30.2	63
	-2	14.3	41.3	44.4	63
	Figure 2D
	Clones containing r1 Escort cells
		n	%
	r1	62	36
	r1+r2a	33	19
	r1+FSC	14	8
	r1+r2a+FSC	65	37
	Total	174
	Figure 2E
	Clones containing FSCs
		n	%
	FSC only	38	25
	FSC+r2a	28	18
	FSC+r1	17	11
	FSC+r1+r2a	72	46
	Total	155
