# Supplementary material for: Adult stem cells and niche cells segregate gradually from common precursors that build the adult Drosophila ovary during pupal development
Source: eLife. 2021 Sep 30;10:e69749. doi: 10.7554/eLife.69749 (PMC8536258; doi:10.7554/eLife.69749)
Supplement: Figure 4—source data 1. [file elife-69749-fig4-data1.xlsx]

## Sheet: Figure4
	Heat-shock to eclosion (days)	Ovarioles with clones	EC		EC/FSC			FSC		FC	EC+FC		Number of dividing precursors per germarium						SE(EC)	SE(EC/FSC)	SE(FSC)	SE(FC)	SE(EC+FC)
				Yield		Yield			Yield			Yield	Total (n)	pEC	pEC/FSC	pFSC	pFC
			%	EC	%	EC	FSC	%	FSC	%	%	EC
			100p		100q		x	100r	y	100s			16/(qx+ry)	pn	qn	rn	sn
	-5d-MARCM raw data	98	46.9	2.4	24.5	4	4	3	4.3	9.2	16.3	2.9							5.04105	4.34454	1.72319	2.9196	3.73116
	-5d-MARCM assuming 70% double clones		63	1.76	13	3.15	3.47	5	4.32	19			24	15.1	3.1	1.2	4.6		0.0985977	0.06846	0.0444878	0.0803458
	-5d-Multicolor raw data	26	42.3	3	30.7	3.5	2.6	7.7	4	11.5	7.7	2.5							9.68883	9.04584	5.22829	6.25654	5.22829
	-5d-Multicolor assuming 30% double clones		52	2.44	24.5	2.07	2.27	9.5	3.86	14			17.3	9	4.2	1.6	2.4		0.120113	0.103084	0.0696531	0.0831055
	-3.5d-MARCM raw data	121	20.7	2.48	23.1	2.75	3.5	3.3	3.25	9.1	43.8	2.58							3.68323	3.83157	1.62397	2.61463	4.51037
	-3.5d-MARCM assuming all double clones		51	1.82	7	3.03	4.73	4.1	3.1	38			34.9	17.8	2.4	1.4	13.3		0.0846194	0.042836	0.0332161	0.0822081
	bond-GAL4 raw data	73	38.4	5.14	35	8.25	5.38	1.4	7	2.7	9.6	9
	bond-GAL4 assuming all double clones		61.9	3.28	24	5.64	3.99	6.3	5.3	7.8			15.1	9.4	3.6	1	1.2
