# Supplementary material for: Adult stem cells and niche cells segregate gradually from common precursors that build the adult Drosophila ovary during pupal development
Source: eLife. 2021 Sep 30;10:e69749. doi: 10.7554/eLife.69749 (PMC8536258; doi:10.7554/eLife.69749)
Supplement: Figure 6—source data 1. [file elife-69749-fig6-data1.xlsx]

## Sheet: Figure 6A
%	I	G	1	2	3	4		ovarioles scored	I	G	1	2	3	4
with FSC	55.814	39.5349	36.5854	43.5897	41.3793	35		with FSC	43	43	41	39	29	20
without FSC	16.129	41.9355	50	58.6207	71.4286	52.381		without FSC	31	31	30	29	28	21
								SE(With)	7.57321	7.45604	7.5224	7.94034	9.14572	10.6654
								SE(Without)	6.60586	8.86269	9.12871	9.14572	8.53735	10.8985
