# Supplementary material for: Adult stem cells and niche cells segregate gradually from common precursors that build the adult Drosophila ovary during pupal development
Source: eLife. 2021 Sep 30;10:e69749. doi: 10.7554/eLife.69749 (PMC8536258; doi:10.7554/eLife.69749)
Supplement: Figure 6—source data 2. [file elife-69749-fig6-data2.xlsx]

## Sheet: Figure 6C
%	I	G	1	2	3	4		ovarioles scored	I	G	1	2	3	4
with FSC	79.1667	54.1667	50	58.3333	33.3333	23.8095		with FSC	24	24	24	24	24	21
without FSC	9.61538	15.3846	21.1538	23.0769	46.1538	69.3878		without FSC	52	52	52	52	52	49
								SE(With)	8.28982	10.1707	10.2062	10.0635	9.6225	9.29429
								SE(Without)	4.08817	5.00341	5.66348	5.84273	6.91321	6.58402
