# Supplementary material for: Adult stem cells and niche cells segregate gradually from common precursors that build the adult Drosophila ovary during pupal development
Source: eLife. 2021 Sep 30;10:e69749. doi: 10.7554/eLife.69749 (PMC8536258; doi:10.7554/eLife.69749)
Supplement: Figure 6—source data 3. [file elife-69749-fig6-data3.xlsx]

## Sheet: Figure 6 B,D
ONLY Egg Chamber 4 OCCUPIED
Percent Occupancy			binning	# instances	% of total ovarioles	* 100		SE
0.0253			0-3	1	0.047619	4.7619		4.64714
0.04			3-6	2	0.0952381	9.52381		6.40564
0.0566			6-9	1	0.047619	4.7619		4.64714
0.0629			9-12	0	0	0		0
0.128			12-15	1	0.047619	4.7619		4.64714
0.2294			15-18	0	0	0		0
0.243			18-21	0	0	0		0
0.2432			21-24	1	0.047619	4.7619		4.64714
0.2538			24-27	4	0.190476	19.0476		8.56891
0.2626			27-30	1	0.047619	4.7619		4.64714
0.2902			30-33	3	0.142857	14.2857		7.63604
0.3016			33-36	1	0.047619	4.7619		4.64714
0.316			36-39	0	0	0		0
0.3258			39-42	1	0.047619	4.7619		4.64714			SEp = sqrt [ p ( 1 - p) / n]
0.34			42-45	0	0	0		0
0.4003			45-48	1	0.047619	4.7619		4.64714
0.4509			48-51	2	0.0952381	9.52381		6.40564
0.487			51-54	0	0	0		0
0.4899			54-57	1	0.047619	4.7619		4.64714
0.5404			57-60	0	0	0		0
0.739			60-63	0	0	0		0
			63-66	0	0	0		0
			66-69	0	0	0		0
			69-72	0	0	0		0
			72-75	1	0.047619	4.7619		4.64714
ONLY Egg Chambers 3&4 OCCUPIED; ONLY % FOR Egg Chamber 4
Percent Occupancy			binning	# instances	% of total ovarioles	* 100		SE
0.005			0-3	2	0.153846	15.3846		2.77539
0.0133			3-6	2	0.153846	15.3846		2.77539
0.052			6-9	1	0.0769231	7.69231		2.04976
0.0568			9-12	1	0.0769231	7.69231		2.04976
0.062			12-15	0	0	0		0
0.0917			15-18	2	0.153846	15.3846		2.77539
0.1652			18-21	0	0	0		0
0.1714			21-24	0	0	0		0
0.2506			24-27	1	0.0769231	7.69231		2.04976
0.3385			27-30	0	0	0		0
0.3415			30-33	0	0	0		0
0.399			33-36	2	0.153846	15.3846		2.77539
0.5948			36-39	0	0	0		0
			39-42	1	0.0769231	7.69231		2.04976
			42-45	0	0	0		0
			45-48	0	0	0		0
			48-51	0	0	0		0
			51-54	0	0	0		0
			54-57	0	0	0		0
			57-60	1	0.0769231	7.69231		2.04976
			60-63	0	0	0		0
			63-66	0	0	0		0
			66-69	0	0	0		0
			69-72	0	0	0		0
			72-75	0	0	0		0
