# Supplementary material for: Adult stem cells and niche cells segregate gradually from common precursors that build the adult Drosophila ovary during pupal development
Source: eLife. 2021 Sep 30;10:e69749. doi: 10.7554/eLife.69749 (PMC8536258; doi:10.7554/eLife.69749)
Supplement: Figure 11—source data 1. [file elife-69749-fig11-data1.xlsx]

## Sheet: Figure 11D
	total ovarioles	clones		EC				EC/FSC						FSC				FC		EC+FC
		n	% ovarioles	n	% clones	total cells	av cells	n	% clones	totalECs	av ECs	total FScs	av FSCs	n	% clones	total FSCs	av FSCs	n	% clones	n	% clones	total ECs	av ECs
18C	108	37	34.2593	13	35.1351	78	6	18	48.6486	191	10.6	106	5.9	0	0	0	0	2	5.40541	4	10.8108	40	10
L29	39	13	33.3333	5	38.4615	18	3.6	8	61.5385	36	4.5	41	5.1	0	0	0	0	0	0	0	0	0
P29 sum	more than 88	23	<26	10	43.4783		4.8	9	39.1304		6.9		4.6	1	4.34783		7	0	0	3	13.0435		7.7
total		73		28	38.3562	96	5.14286	35	47.9452	227	8.25429	147	5.38286	1	1.36986	0	7	2	2.73973	7	9.58904	40	9.01429
											288.9		188.4
	SE(EC)	SE(EC/FSC)	SE(FSCs)	SE(FC)	SE(EC+FC)
18C	7.84828	8.21695	0	3.71746	5.10487
L29	13.4932	13.4932	0	0	0
P29 sum	10.3367	10.1764	4.25226	0	7.02237
total	5.69116	5.84711	1.36045	1.91056	3.44617
		º
