# Supplementary figures and images for: Adult stem cells and niche cells segregate gradually from common precursors that build the adult Drosophila ovary during pupal development.
Source: eLife journal article supplement (doi:10.7554/elife.69749), 2021-09-30

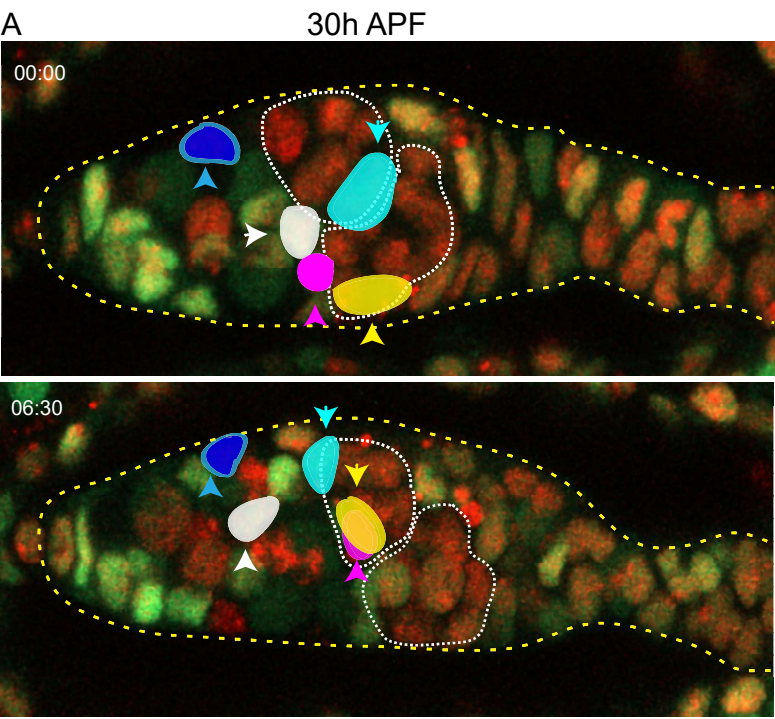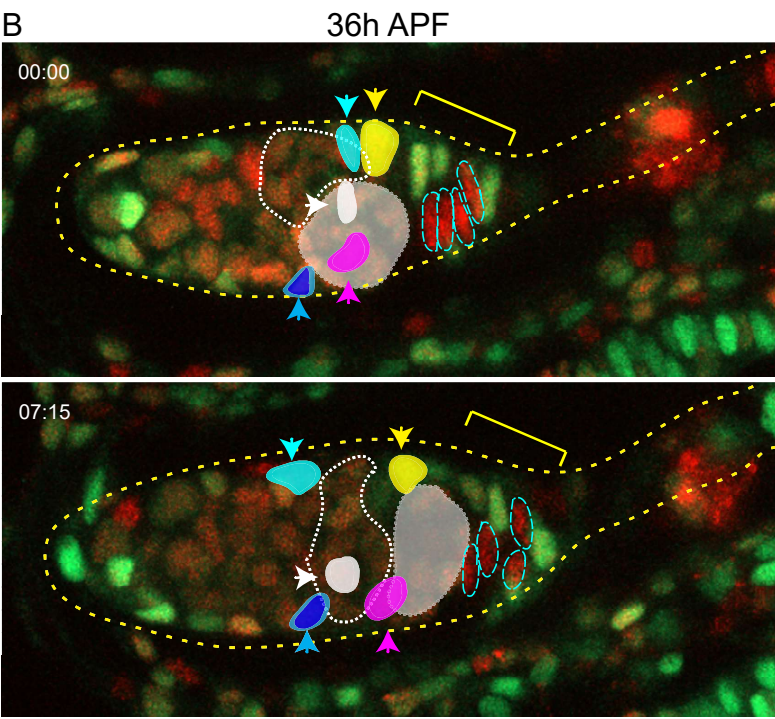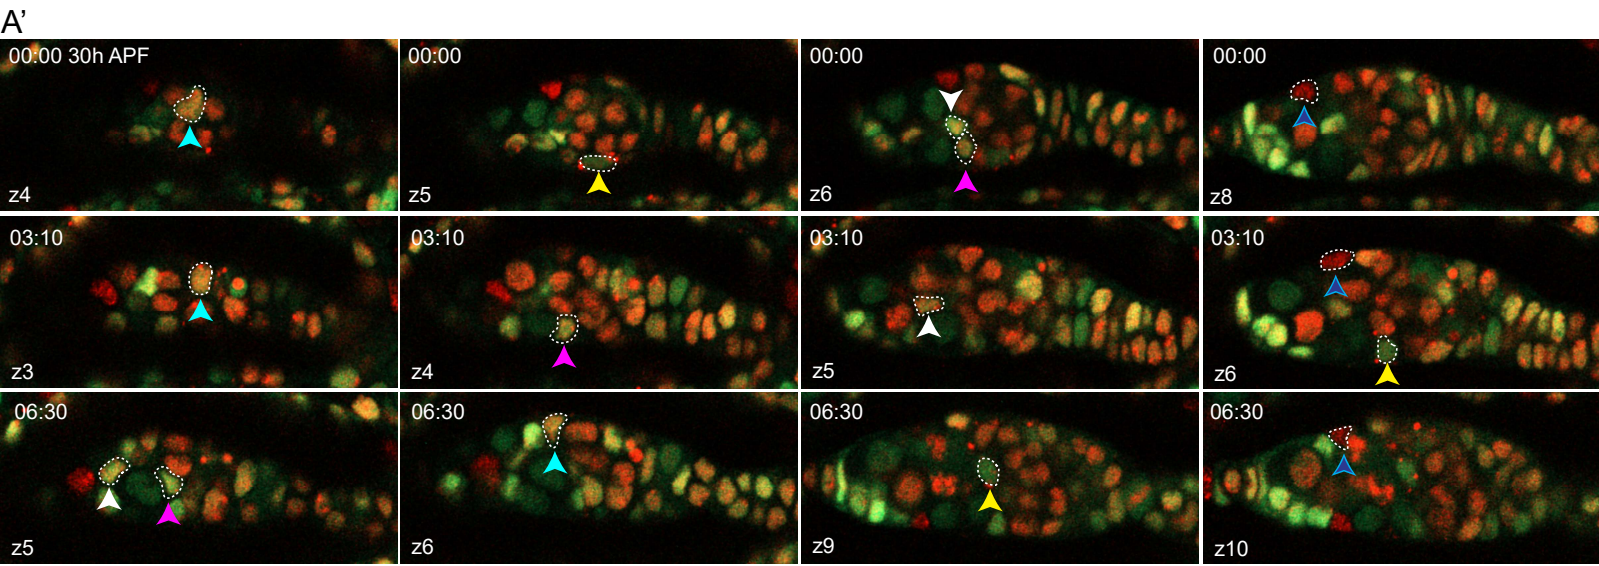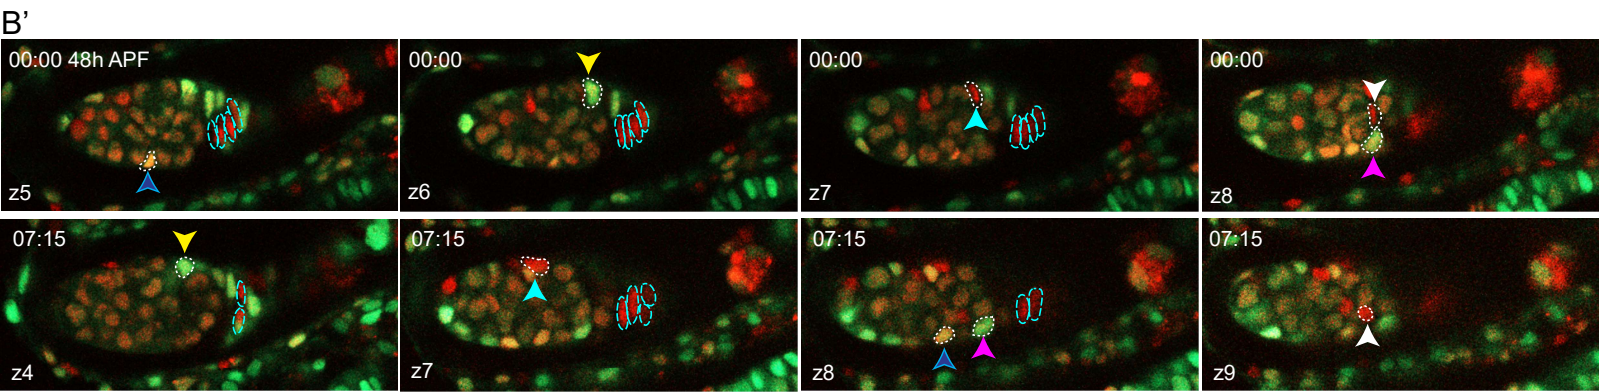

Supplement: supp [file elife-69749-supp-v1.zip]

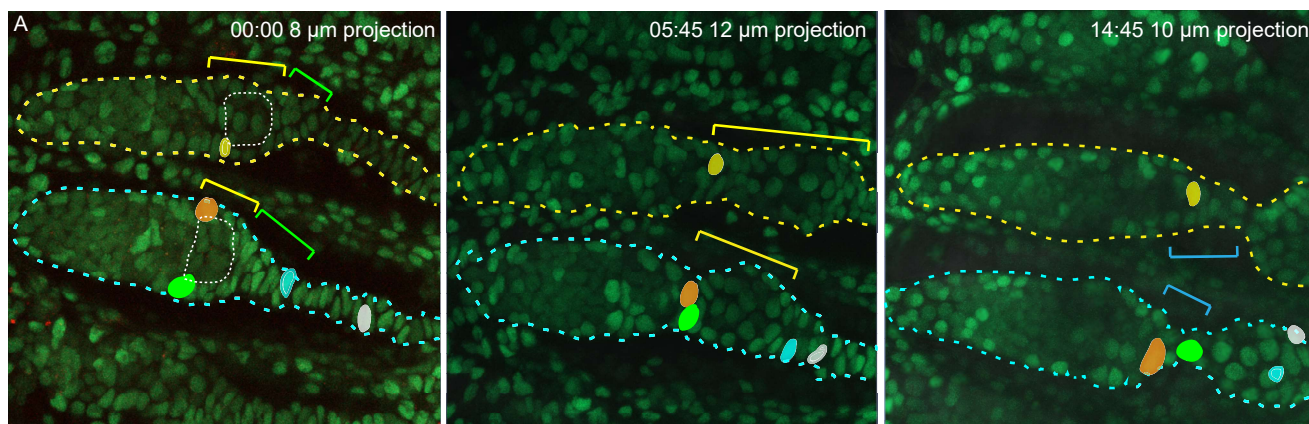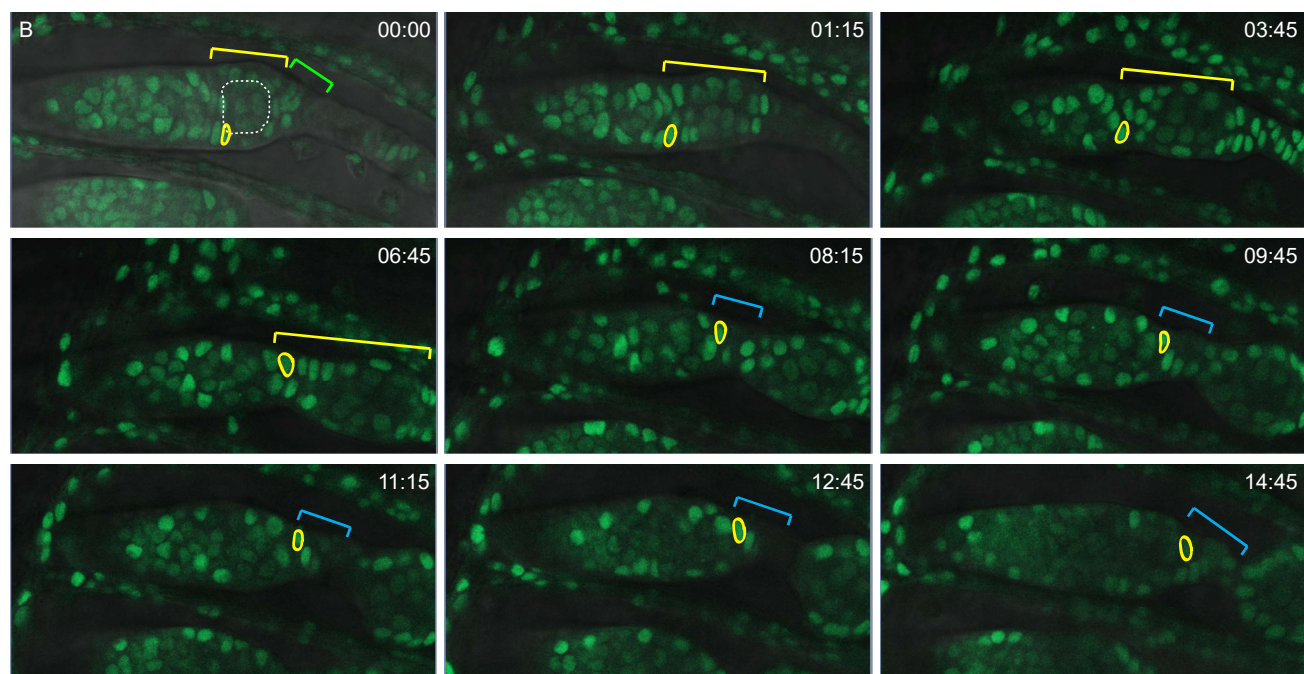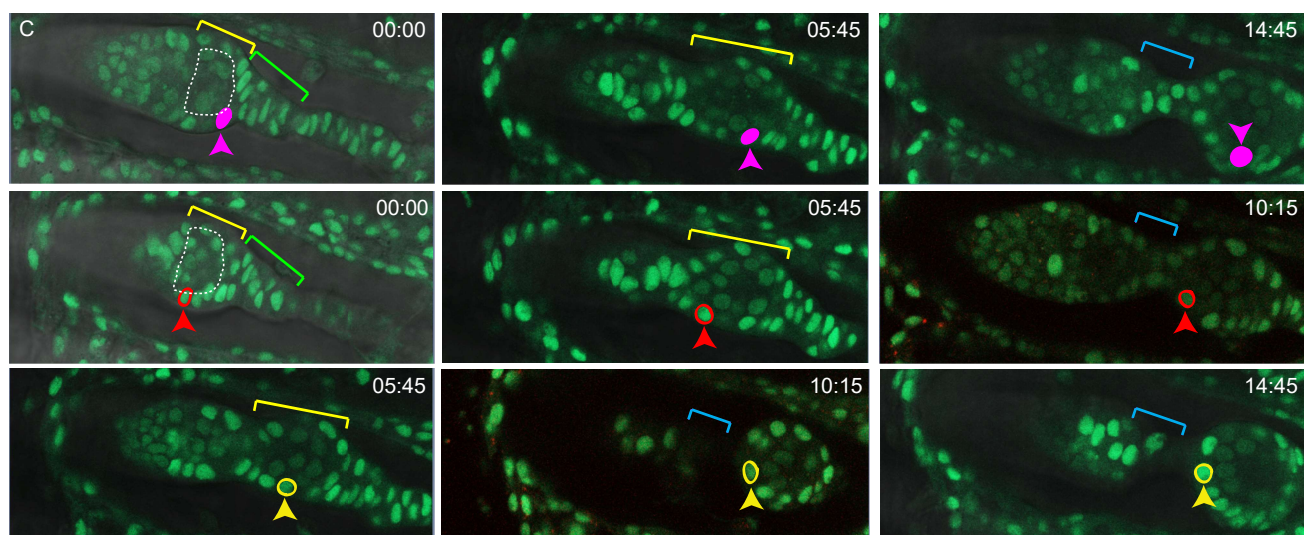

Supplement: supp [file elife-69749-supp-v1.zip]

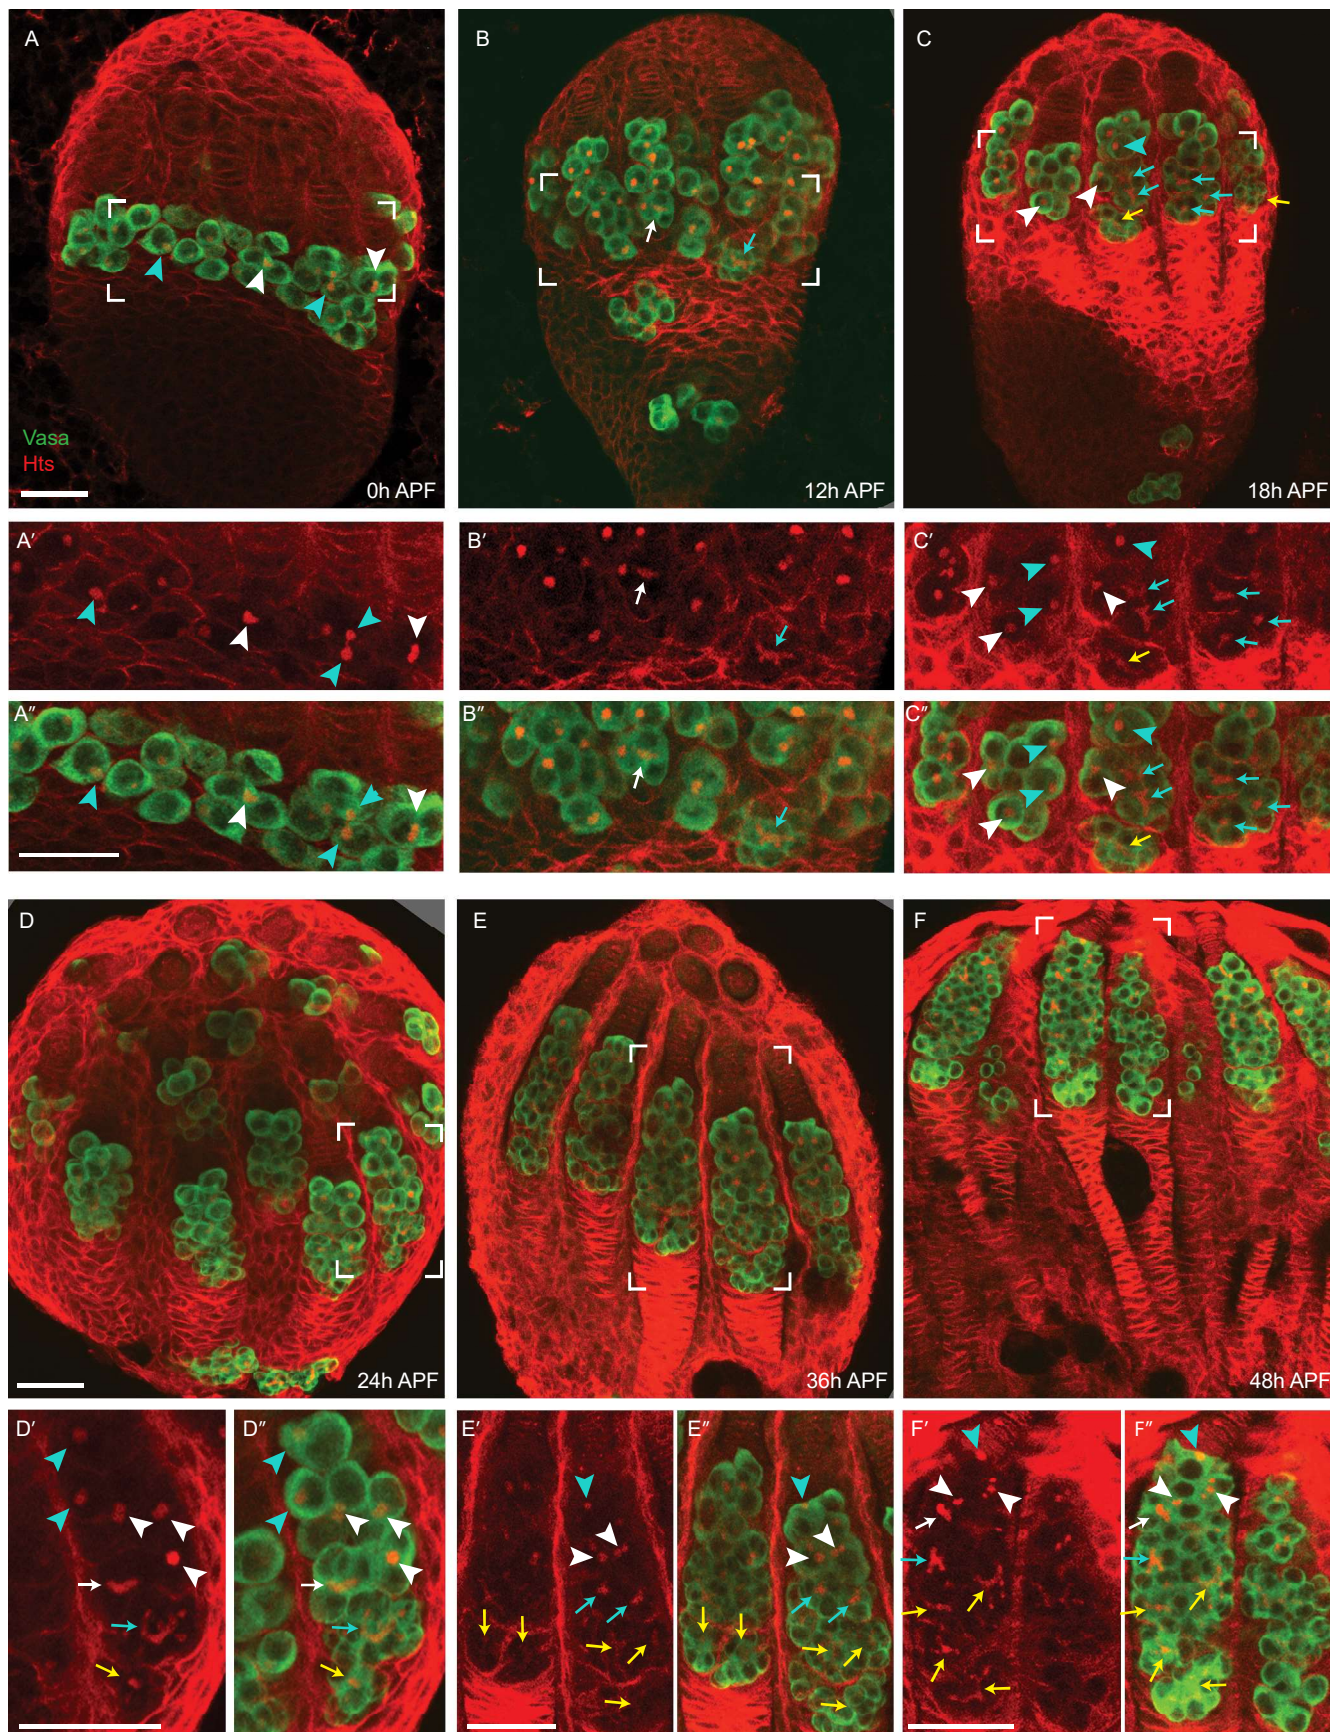

Supplement: supp [file elife-69749-supp-v1.zip]

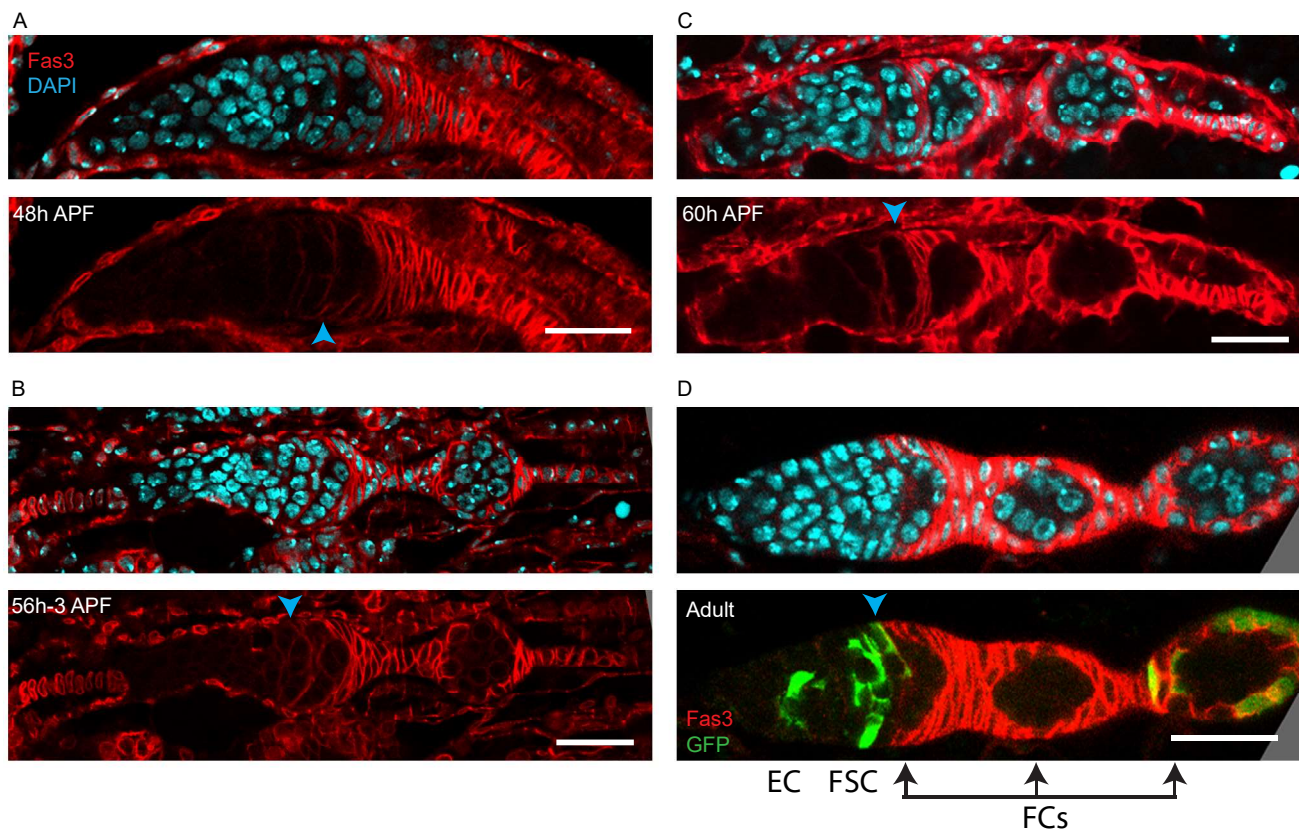

Supplement: supp [file elife-69749-supp-v1.zip]

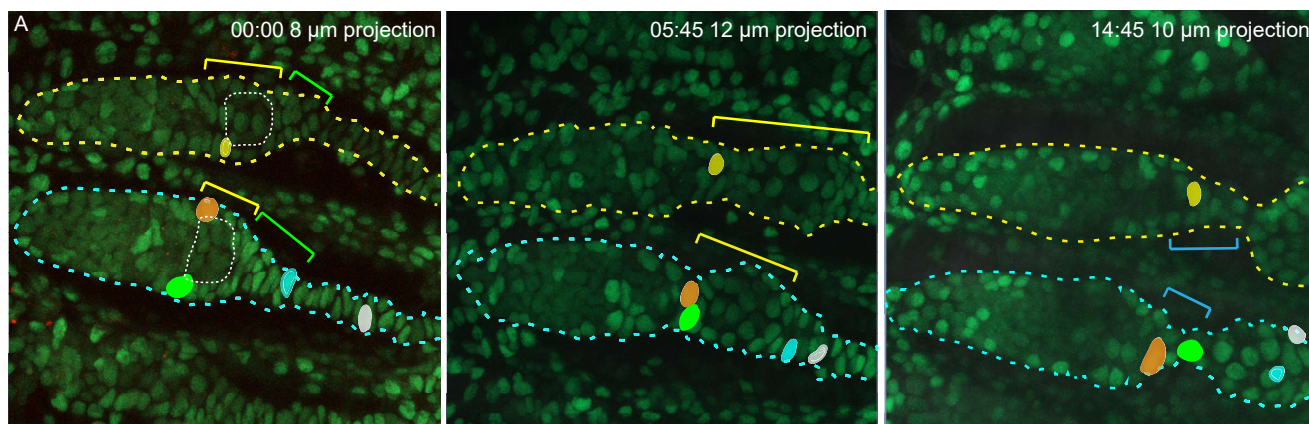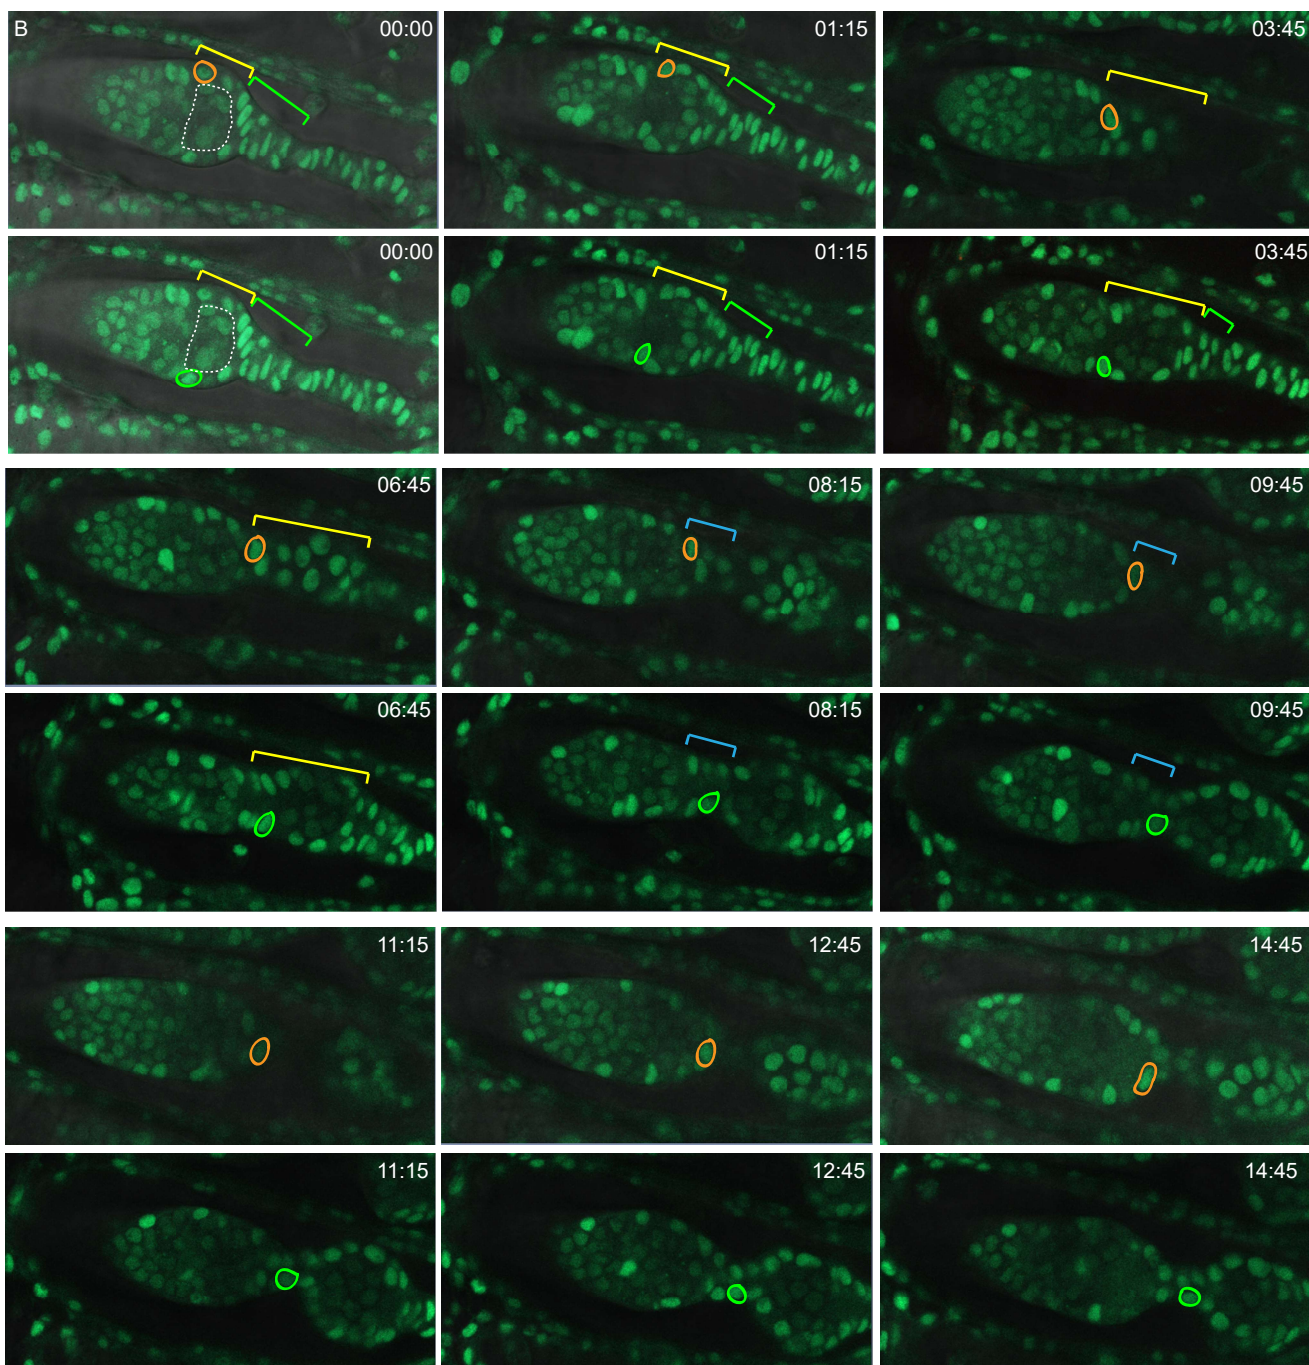

Supplement: supp [file elife-69749-supp-v1.zip]

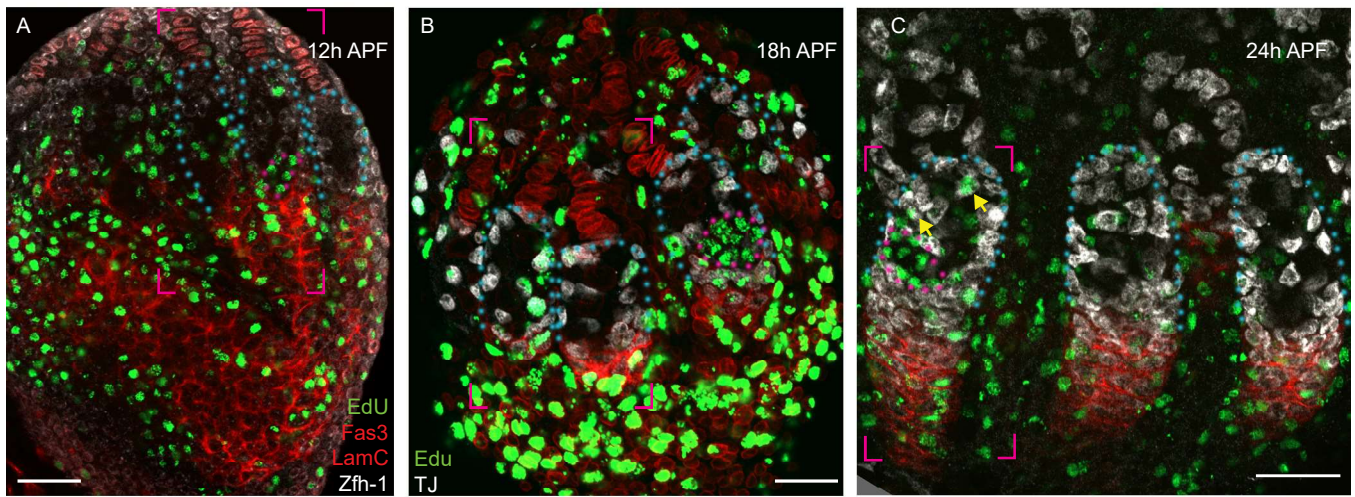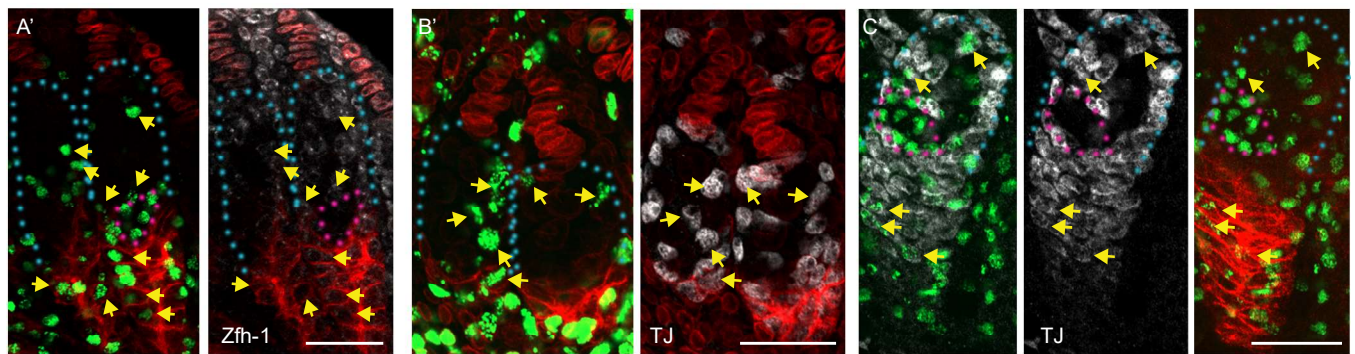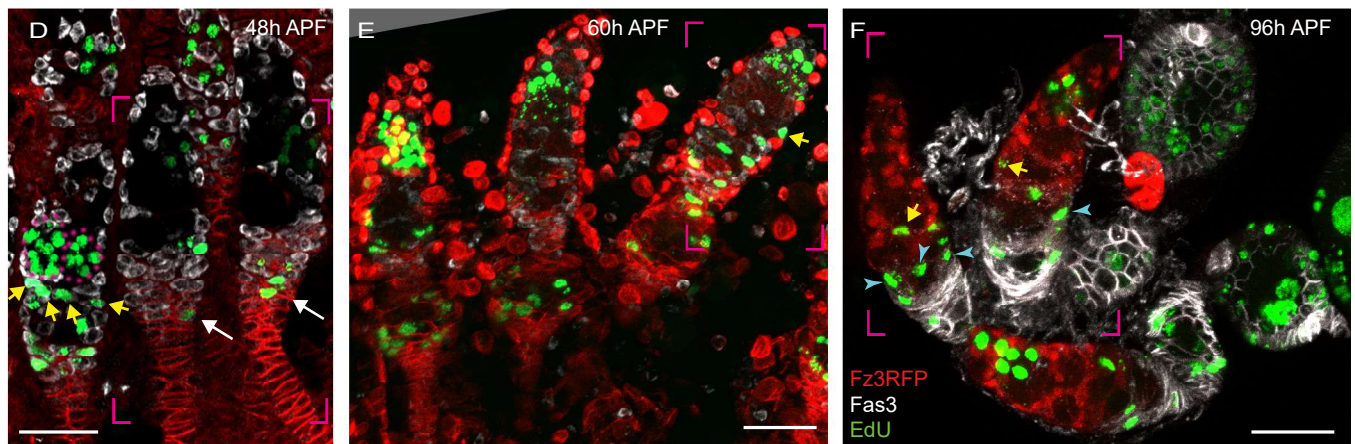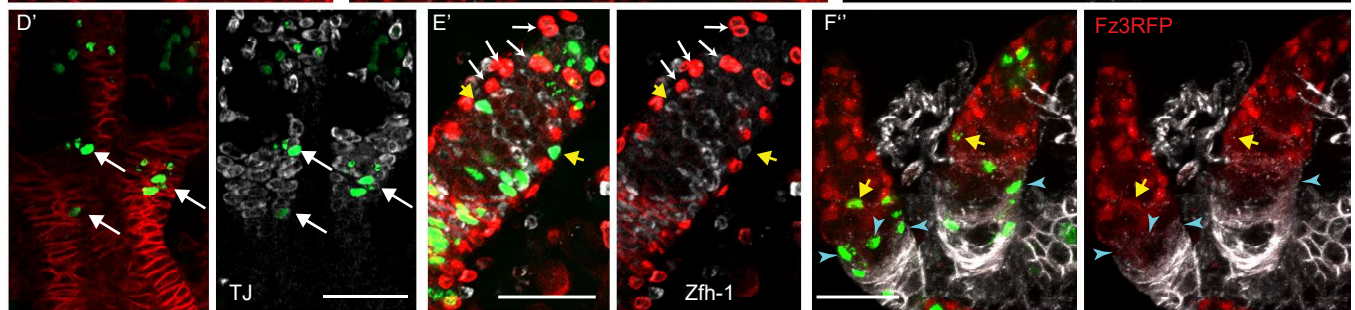

Supplement: supp [file elife-69749-supp-v1.zip]

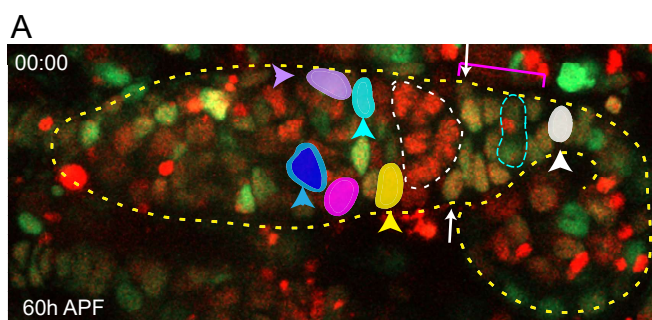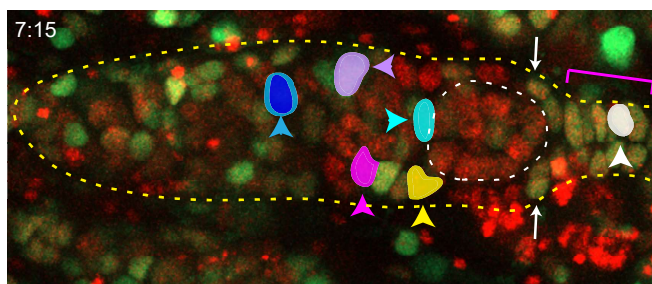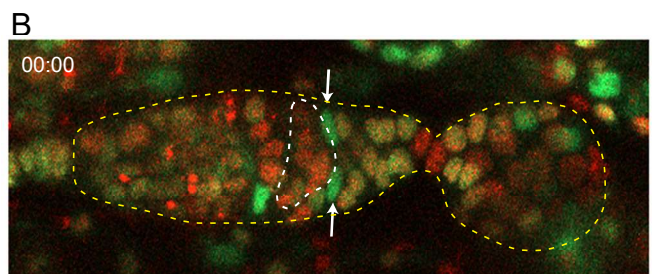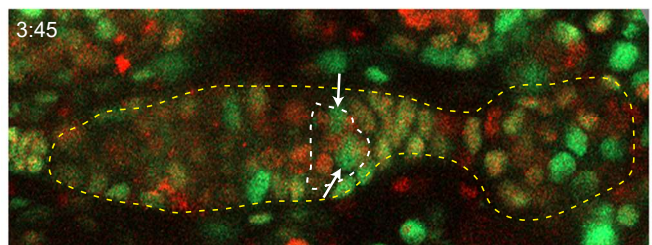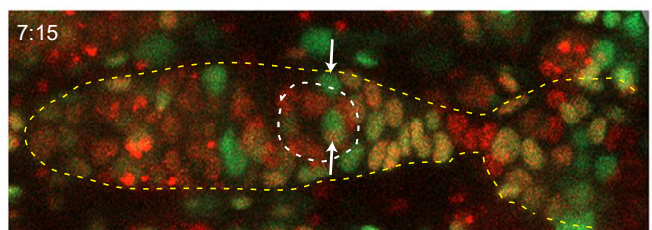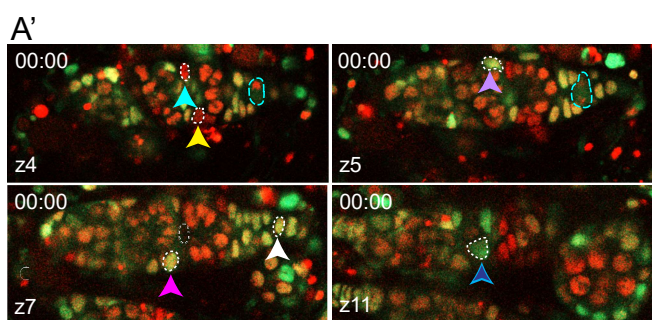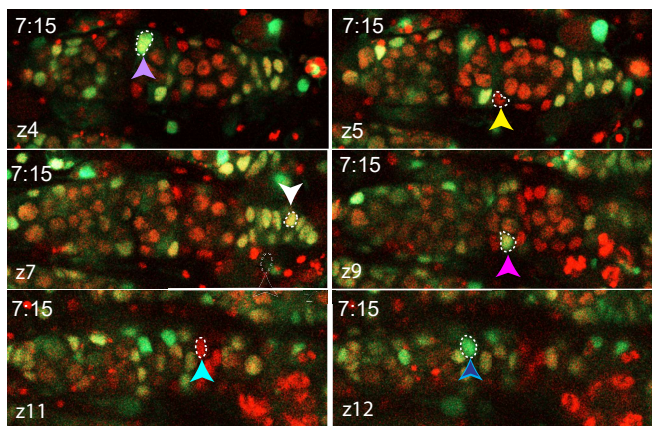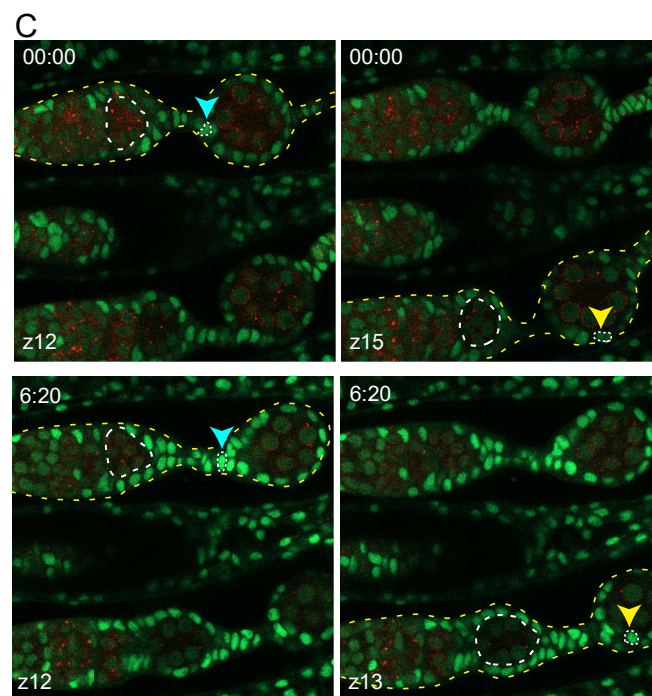

Supplement: supp [file elife-69749-supp-v1.zip]

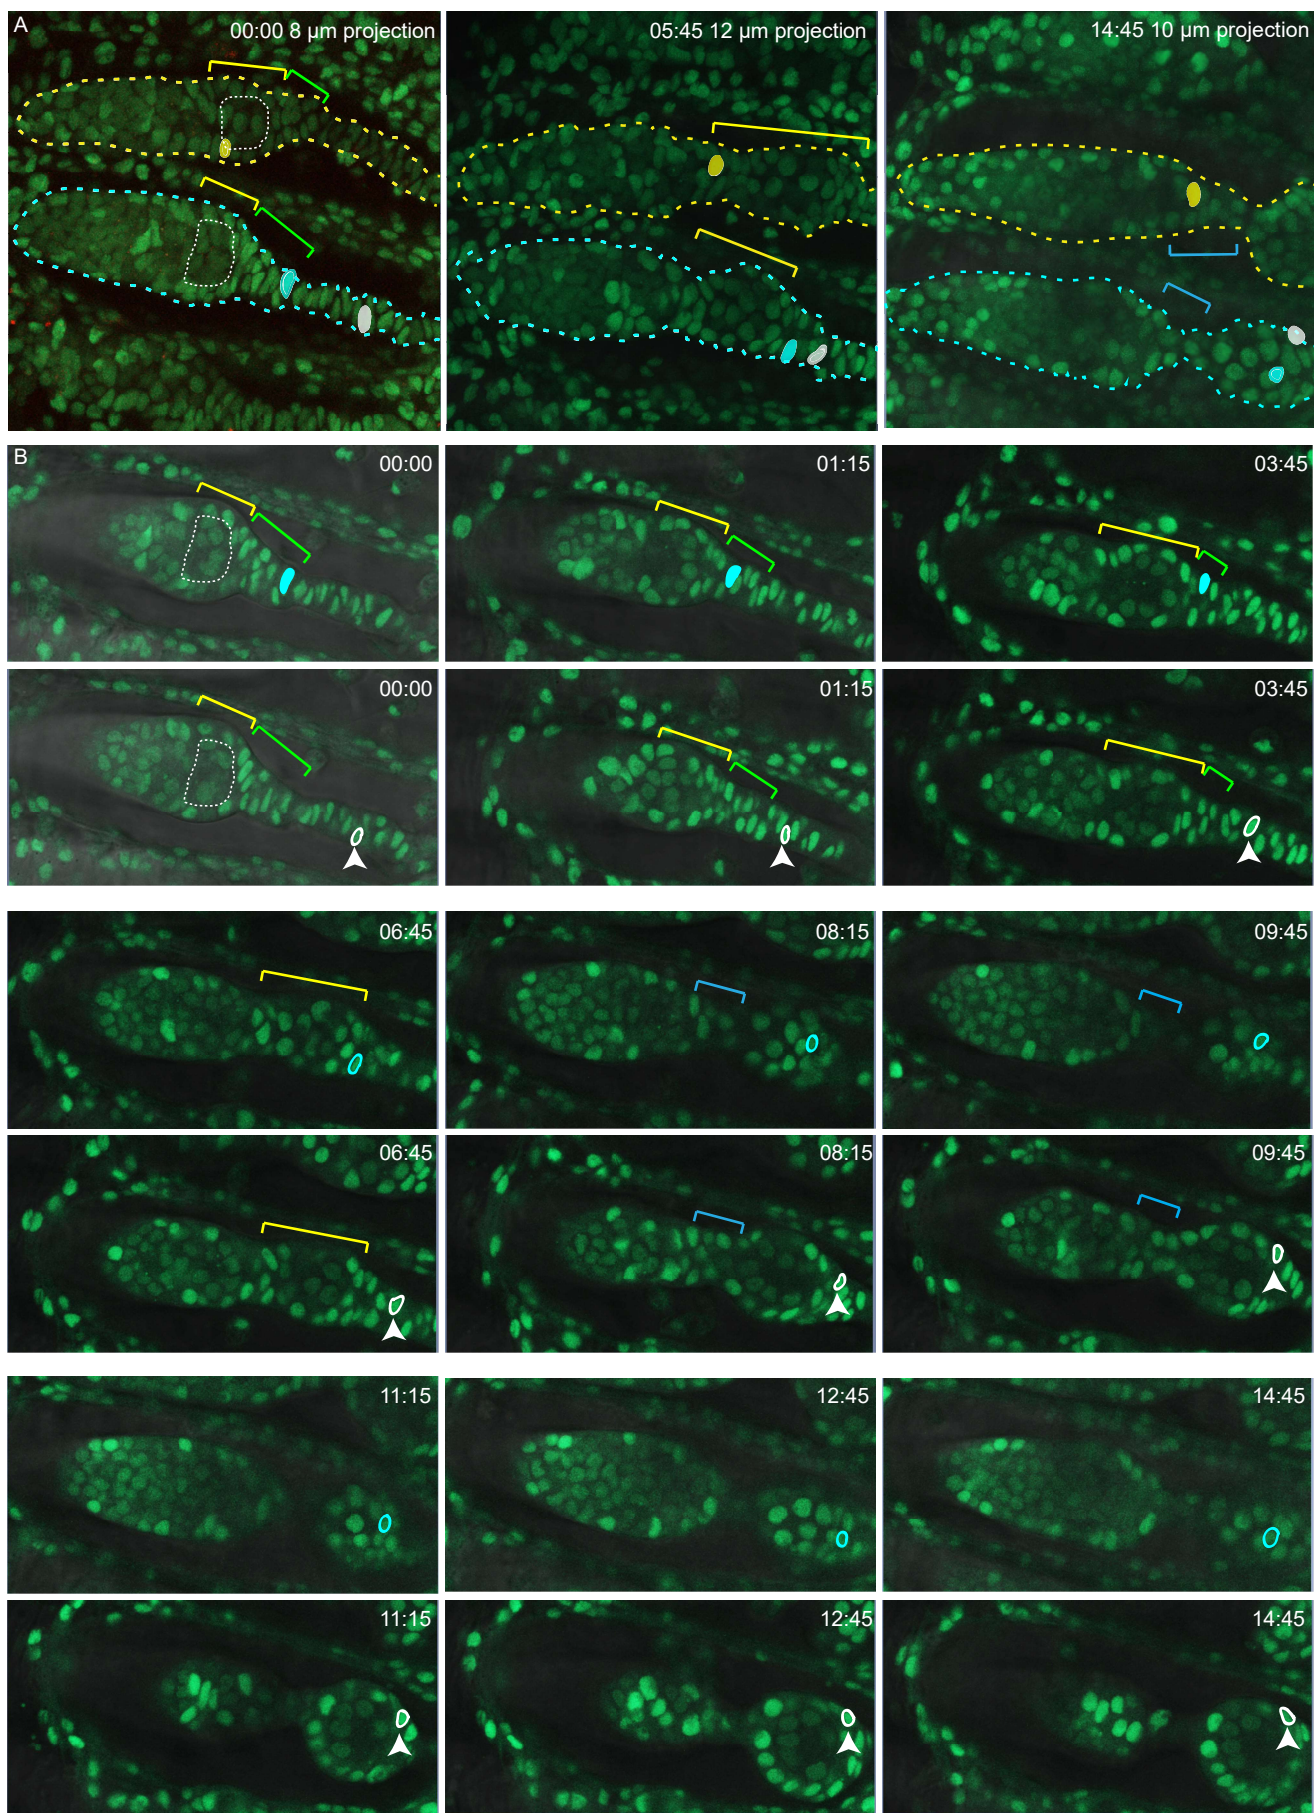

Supplement: supp [file elife-69749-supp-v1.zip]

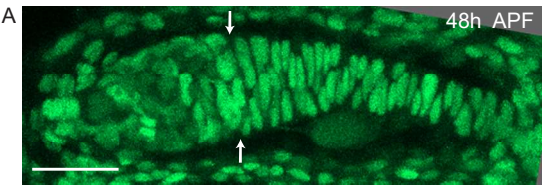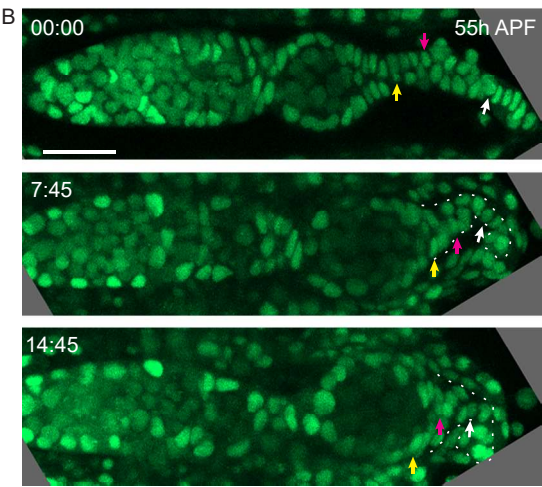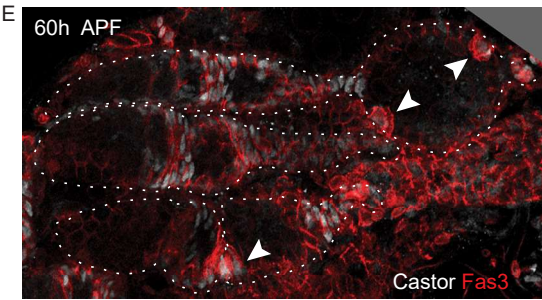

**C**

| Time  | EGC | Stalk | Total |
|-------|-----|-------|-------|
| 0:00  | 7   | 25    | 32    |
| 7:45  | 9   | 14    | 23    |
| 14:45 | 0   | 13    | 13    |

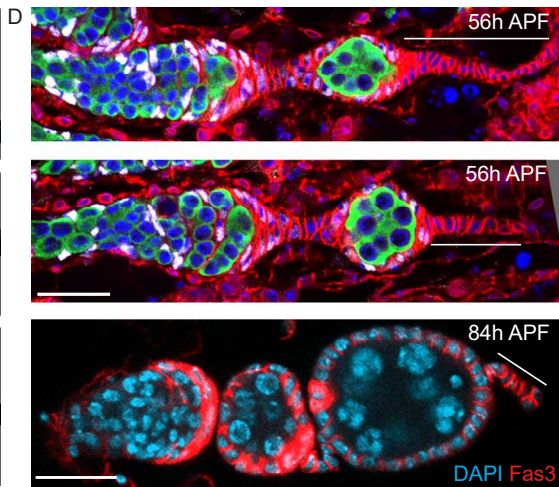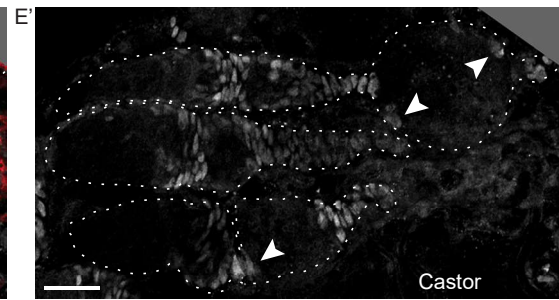

Supplement: supp [file elife-69749-supp-v1.zip]
